# Supplementary material for: Genetic factors related to the widespread dissemination of ST11 extensively drug-resistant carbapenemase-producing Klebsiella pneumoniae strains within hospital
Source: PubMed Central journal article supplement — Chin Med J (Engl). 2020 Sep 24;133(21):2573–85. doi: 10.1097/CM9.0000000000001101 (PMC7722564; doi:10.1097/cm9.0000000000001101), 2020-09-24

**Supplementary Figure 1:** Insertion sequences and transposases within the 13 *Klebsiella pneumoniae* strains were detected using the online platform ISfinder. The average number of insertion sequences in the XDR, MDR, and S strains decreased progressively, and the number of the insertion sequences in the XDR group *e.g.*, ISKpn26, IS26, or ISKpn14, is apparently larger than in the MDR and S groups. XDR: Extensively drug resistant; MDR: Multidrug-resistant.

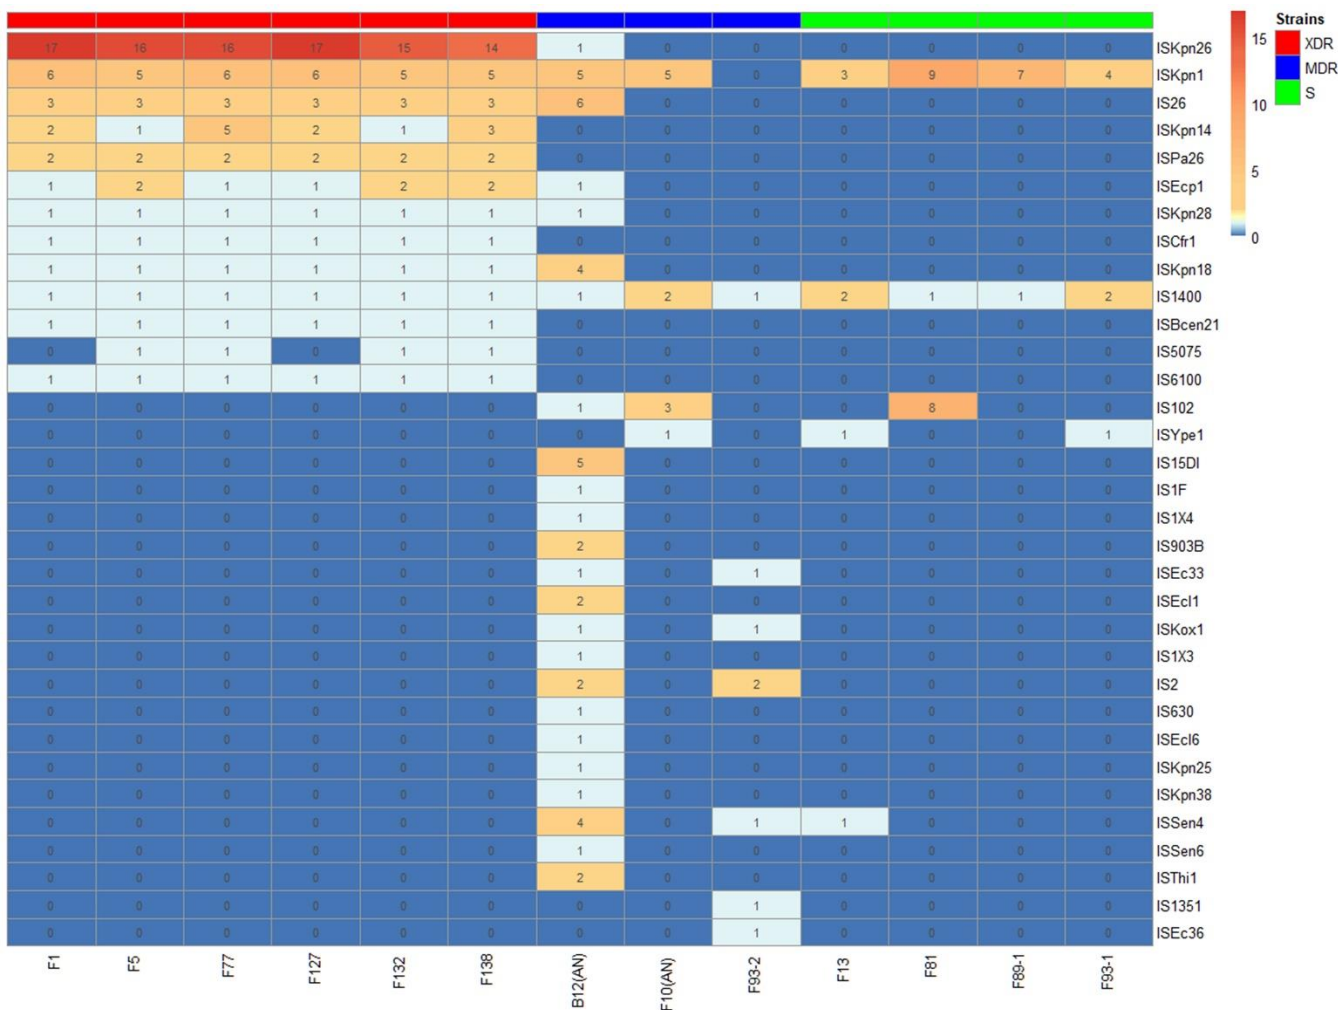

**Supplementary Figure 2:** Core SNPs between each pair of the six ST11 carbapenemase-producing *Klebsiella pneumoniae* (CP-Kp) strains were called using kSNP. The numbers of core SNPs between each pair of the six ST11 CP-Kp XDR strains ranged from 4-55. Furthermore, there were 7 core SNPs between F1 and F127 and 4-14 core SNPs among F5, F77, F132, and F138, while there were 50-55 core SNPs differentiating the strains of F1 and F127 from the strains of F5, F77, F132, and F138. SNPs: Single-nucleotide polymorphisms.

|             |           |           |            |             |             |             |
|-------------|-----------|-----------|------------|-------------|-------------|-------------|
| <b>F1</b>   | <b>F1</b> |           |            |             |             |             |
| <b>F5</b>   | 52        | <b>F5</b> |            |             |             |             |
| <b>F77</b>  | 50        | 6         | <b>F77</b> |             |             |             |
| <b>F127</b> | 7         | 55        | 53         | <b>F127</b> |             |             |
| <b>F132</b> | 50        | 6         | 4          | 53          | <b>F132</b> |             |
| <b>F138</b> | 52        | 14        | 12         | 55          | 12          | <b>F138</b> |

**Supplementary Figure 3:** Distribution of Clusters of Orthologous Groups (COG) functional categories among the 13 *Klebsiella pneumoniae* strains. All predicted proteins in the 13 strains genomes were aligned against the COG database. The distributions of the functional genes in the 13 genomes were similar.

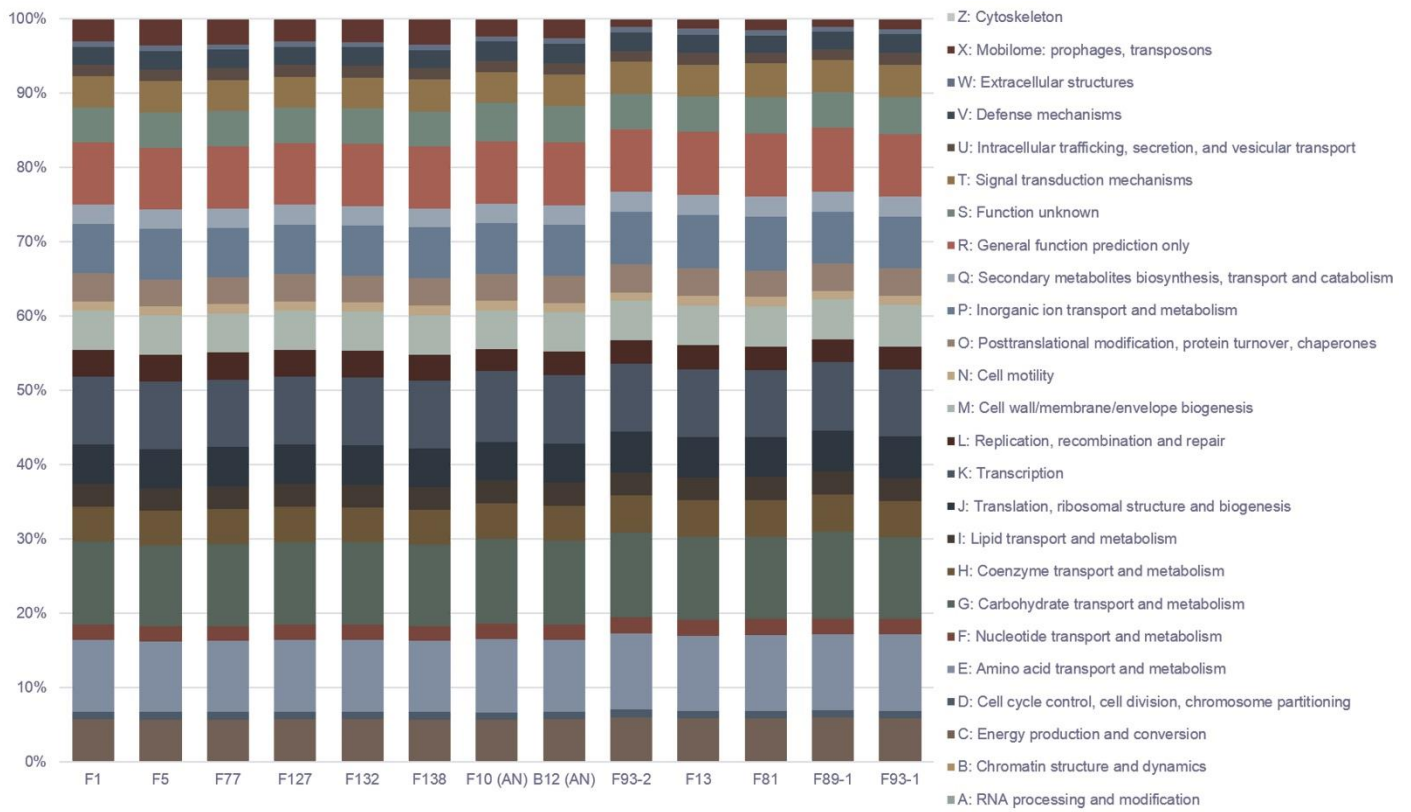

Supplement: cm9-133-2573-s005.pdf [file cm9-133-2573-s005.pdf]
